## 1 **Mixed Culture of Bacterial Cell for Large Scale DNA Storage**

2 *Min Hao†, Hongyan Qiao†, Yanmin Gao†, Zhaoguan Wang, Xin Qiao, Xin Chen and Hao Qi\**

3

4 Min Hao

5 Key Laboratory of Systems Bioengineering (Ministry of Education), School of Chemical Engineering  
6 and Technology, Tianjin University, Tianjin 300000, China.

7 Email: [min1213@tju.edu.cn](mailto:min1213@tju.edu.cn)

8

9 Hongyan Qiao

10 Key Laboratory of Systems Bioengineering (Ministry of Education), School of Chemical Engineering  
11 and Technology, Tianjin University, Tianjin 300000, China.

12 Email: [qhy\\_@tju.edu.cn](mailto:qhy_@tju.edu.cn)

13

14 Yanmin Gao

15 Key Laboratory of Systems Bioengineering (Ministry of Education), School of Chemical Engineering  
16 and Technology, Tianjin University, Tianjin 300000, China.

17 Email: [xiaomingao@tju.edu.cn](mailto:xiaomingao@tju.edu.cn)

18

19 Zhaoguan Wang

20 Key Laboratory of Systems Bioengineering (Ministry of Education), School of Chemical Engineering  
21 and Technology, Tianjin University, Tianjin 300000, China.

22 Email: [wzg1895@tju.edu.cn](mailto:wzg1895@tju.edu.cn)

23

24 Xin Qiao

25 Key Laboratory of Systems Bioengineering (Ministry of Education), School of Chemical Engineering  
26 and Technology, Tianjin University, Tianjin 300000, China.

27 Email: [2018207595@tju.edu.cn](mailto:2018207595@tju.edu.cn)

28

29 Dr. Xin Chen

30 Center for Applied Mathematics, Tianjin University, Tianjin 300000, China.

31 Email: [chen\\_xin@tju.edu.cn](mailto:chen_xin@tju.edu.cn)

32

33 Dr. Hao Qi

34 Key Laboratory of Systems Bioengineering (Ministry of Education), School of Chemical Engineering  
35 and Technology, Tianjin University, Tianjin 300000, China.

36 Email: [haoq@tju.edu.cn](mailto:haoq@tju.edu.cn)

37

38 † Equal contribution

39 \* Correspondence should be addressed to H. Q. ([haoq@tju.edu.cn](mailto:haoq@tju.edu.cn))

40

41 Keywords: DNA storage, oligo pool, Escherichia coli, mixed culture, synthetic biology

42

43

44

45 **Abstract:**

46 DNA emerged as novel material for mass data storage, the serious problem human society is facing.  
47 Taking advantage of current synthesis capacity, massive oligo pool demonstrated its high-potential in  
48 data storage in test tube. Herein, mixed culture of bacterial cells carrying mass oligo pool that was  
49 assembled in a high copy plasmid was presented as a stable material for large scale data storage. Living  
50 cells data storage was fabricated by a multiple-steps process, assembly, transformation and mixed culture.  
51 The underlying principle was explored by deep bioinformatic analysis. Although homology assembly  
52 showed sequence context dependent bias but the massive digital information oligos in mixed culture  
53 were constant over multiple successive passaging. In pushing the limitation, over ten thousand distinct  
54 oligos, totally 2304 Kbps encoding 445 KB digital data including texts and images, were stored in  
55 bacterial cell, the largest archival data storage in living cell reported so far. The mixed culture of living  
56 cell data storage opens up a new approach to simply bridge the in vitro and in vivo storage system with  
57 combined advantage of both storage capability and economical information propagation.

## 58 **1. Introduction:**

59 While being biological material carrying genomic information, DNA has been proven of great potential  
60 in storing information in its nucleic acid sequence for long-term in high density. The increased capability  
61 of high throughput chip synthesis based writing and next generation sequencing based reading  
62 technologies greatly advanced the development of synthesis nucleic acid mediated archival storage.  
63 Simply put, information was synthesized into DNA oligo molecule and then read out by sequencing. Till  
64 now, a number of systems have been developed storing massive archival data into synthetic oligo pool.<sup>[1]</sup>  
65 <sup>2]</sup> Classical electrical communication and computing algorithms such as Fountain and Reed-Solomon  
66 code have been adapted for conversation of digital binary information to four letters nucleic acids  
67 sequence and error correction.<sup>[3, 4]</sup> Restricted by current high throughput oligo synthesis techniques, oligo  
68 with from 100 to around 200 nts in length was the major materials for information storage in test tube.  
69 However, the oligo size well fits with the major commercial sequencing platform, such as Illumina,<sup>[5]</sup> by  
70 which sequence from 50 to 200 nucleotides can be obtained at single read from one oligo terminal end.  
71 Furthermore, the cost of chip-based synthesis achieved the lowest DNA synthesis, at least one or two  
72 orders of magnitude lower than traditional column-based oligo synthesis. Thus far, as medium materials  
73 synthesis oligo pool based in vitro system has been largely expanded for up to 200 MB information  
74 storage.<sup>[6]</sup>

75 Besides test tubes, microbe cells are able to carry the synthesis DNA material with many advanced  
76 features for archival information storage. In comparing with the cell-free in vitro system, the genomic  
77 maintenance mechanism ensure DNA molecule replicated in a high-fidelity manner in living cells and  
78 then higher stability and longer storage period could be expected. Moreover, the DNA molecule copy  
79 rate is several orders of magnitude higher than general in vitro replication methods, such as PCR. These  
80 advanced features make living cell an attractive materials for copy and distribution of information at low  
81 cost. Synthetic DNA fragment encoding archival data have been reported being inserted into genome of  
82 various organisms, including *E. coli*,<sup>[7]</sup> *B. subtilis*<sup>[8]</sup> and yeast.<sup>[9]</sup> Molecular tools were developed from

83 engineered various DNA maintenance and genome modification systems, including reverse-  
84 transcription,<sup>[10]</sup> recombinase<sup>[11]</sup> and CRISPR-cas,<sup>[12]</sup> for directly writing archival data into genome in a  
85 highly controlled fashion. Moreover, circular plasmid was designed for carrying information as well and  
86 the multiple copy number of plasmids in microbial cell could facilitate the recovery of DNA material.  
87 Seemingly, the in vitro and in vivo DNA storage approach develop as mutually independent system. For  
88 in vitro system, massive short piece oligos including even up to 1E10 distinct strands<sup>[13]</sup> from microchip  
89 synthesis were read out by a straight reading workflow comprising PCR amplification and NGS  
90 sequencing.<sup>[14]</sup> In contrast, cell is technically able to store much larger DNA fragment. For a long time,  
91 people used to save hundreds of kilobase pairs DNA fragment cloned from human genome in *E. coli*  
92 cells.<sup>[15]</sup> However, being limited by current technological capability, synthesis of large DNA fragment,  
93 generally over kilo-nucleotides, is a highly time and cost consuming procedure.<sup>[16]</sup> Even though entire  
94 bacterial chromosome has been synthesized completely,<sup>[17]</sup> it requires many efforts to carefully design  
95 the oligo units and probably takes long time, generally over months, to build them into large fragment.<sup>[18]</sup>  
96 Moreover, it is relatively complicated to efficiently transform large DNA inside cell. Thus far, in vivo  
97 DNA storage has only been tested in a relatively small scale, no larger than few thousand nucleotides,<sup>[19]</sup>  
98 far smaller than in vitro system. In considering storage capability, massive short oligo pool has advantage  
99 in the ease of scale-up and synthesis cost. However, DNA storage inside cell has advantage in stable  
100 DNA material maintaining for long period of time and low cost replication.<sup>[2]</sup>  
101 Here, we demonstrated that mixed culture of bacterial cells carrying massive DNA oligos as economical  
102 and sustainable material for stable information storage, in which massive DNA oligos with hundreds of  
103 nucleotides in length from high throughput chip-synthesis. A BASIC code system, a previously  
104 developed DNA mediated distributed information storage in our lab, was applied to translate digital  
105 binary information to nucleotide base sequence and an encoding redundancy of 1.56% at software level  
106 was designed to tolerate the physical dropout of minority oligo. In pushing the limitation, oligo pools  
107 comprising of 509 and 11520 distinct oligos, generating the largest population for mixed culture of

108 bacterial cell, were stored. For covering the huge number of oligo population, we assembled them in a  
109 redundant fashion and then stored in a mixed culture on solid or liquid medium. Furthermore, the  
110 underlying principle of the manufacture of data storage cells was explored with developed deep  
111 bioinformatic analysis tools. It demonstrated that oligo homology assembly process is relatively high  
112 biased in sequence context and the oligo copy number distribution was more skewed with the assembly  
113 fragment number increased. However, after the assembly and transformation, interestingly, it found that  
114 the massive oligo remained stable in mixed culture of *E. coli* cells even over multiple passages and  
115 remained the quality of digital oligo for perfect information decoding. Finally, it demonstrated that this  
116 simple materials of mixed culture of cell achieved in vivo storage of 445 KB digital files in total 2304  
117 Kbps synthesis DNA in a fast and economical way, the largest scale archival data storage in living cell  
118 so far, and paved the way for biological data storage taking advantage of both in vitro synthesis capacity  
119 and the biological power of living cell in an economical and efficient way, which is crucial for develop  
120 practical cold data storage in large scale.

## 121 **2. Results:**

### 122 **2.1 DNA data storage in mixed cell culture**

123 Thus far, oligo pool comprising of massive distinct oligos are used as material storing archival data in  
124 the major in vivo DNA storage approaches. We challenged to merge the advantage of both in vitro oligo  
125 pool mediated data storage and in vivo cell system with a novel designed strategy improve the DNA  
126 material for data storage. As illustrated in **Figure 1**, binary sequence of archival data was encoded to  
127 nucleotide base sequence and spilled into group of oligo strand with few hundreds of nucleotides in  
128 length by a BASIC code, which was developed for a DNA oligo pool mediated information distributed  
129 storage.<sup>[20]</sup> In this encoding system, relative low coding redundancy of 1.56% to tolerate the whole oligo  
130 physical loss, the dropout. Thus, information could be perfectly decoded as long as more than 98.44% of  
131 designed oligo can be retrieved. In addition, oligo strand with letter mutant including base substitution or  
132 insert/deletion could be corrected by predesigned coding algorithms.<sup>[20]</sup> Following sequence encoding  
133 design, oligo was physically synthesized from the emerging high-throughput chip-based synthesis.  
134 Currently, there is only a few commercial products available for massive oligo synthesis, and the quality  
135 of oligo pool varied with the manufacture and even the batch. As reported in many previous studies, the  
136 unevenness of molecular copy number in oligo pool caused serious problem in the DNA material for data  
137 storage.<sup>[21]</sup> For storing oligo in living cell, oligo could be assembled into high copy number vector  
138 plasmid using homology-based cloning method, without any specific sequence, and then the large  
139 population of plasmid could be transferred into well-used *E. coli* engineering strain and stored in a mixed  
140 culture way. Thus, oligo pool could simply be converted to a living cell-based material for data storage.  
141 Mixed culture is a well-used approach majorly in metabolism engineering and direct evolution, which  
142 used to generate DNA library with large diversity in living cell. In considering data storage, it requires  
143 cell to stably carry these digital DNA sequence in large number. However, there is still short of systematic  
144 analysis on how stable the mixed culture carrying large massive oligo will be. Therefore, a multiple-step  
145 process, including homology assembly, transformation and mixed culture, was designed to constructed

146 the living cell-based DNA storage. For increasing the homology cloning efficiency, the homology arm  
147 sequence was designed with less secondary structure and less cross recognition with each other in  
148 NUPACK (Figure S1 and S2).<sup>[22]</sup> The homology arm was fused with oligo by a PCR amplification  
149 through the uniform adapter on both side (**Figure 2a**, Figure S3). In the amplified structure, two Not I  
150 cleavage sites were designed on both ends, by which the original oligo sequence could be directed  
151 cleaved out from the vector. A redundant assembly is designed to increase the foreign DNA load on each  
152 vector. Totally, 6 homology arm sequences were designed for multiple fragments homology assemble  
153 into single vector plasmid (Figure S4). Oligos fused with different combination of homology arms could  
154 be assembled together. Therefore, in single vector plasmid, 1F, 3F and 5F of fragments could be  
155 assembled and each fragment could cover the intact oligo pool. Thus, the multiple fragments assembly  
156 principally could largely increase the chance of oligo being assembled into vector plasmid. Following  
157 the assembly, circular DNA will be transformed into *E. coli* DH10 $\beta$  cell for mixed culture and then the  
158 massive oligos could be retrieved from isolated plasmid.

## 159 **2.2 Mixed culture of redundant assembled massive oligo pool**

160 Firstly, we tested a pool comprising of 509 distinct oligos as part of a large chip synthesized pool. It  
161 known that cell lose its population due to disadvantage in growth rate in mixed culture.<sup>[23]</sup> With  
162 concerning loss of cell carrying minority oligo in the pool, electrically transformed cells were cultured  
163 on the surface of solid medium, which should give all cell carrying the assembled plasmid equal chance  
164 to grow up. The colony number assembled from 1F assembly of total 0.08 pmol oligo fragment and 0.16  
165 pmol vector was counted almost twice of the 3F (assembly of 0.8 pmol each oligo fragment and 0.16  
166 pmol vector) and 5F (assembly of 0.8 pmol each oligo fragment and 0.16 pmol vector) on solid medium  
167 surface (Figure 2b and Figure S5-7). There is a trade-off between the assembly efficiency and capability,  
168 the redundant assembly could increase the load capability for each vector, but significantly decrease the  
169 assembly efficiency. Totally, 122.4 and 158.6 and 268 copy per designed oligo was calculated from the

170 counted colony number for 1F, 3F and 5F respectively. After plasmid isolation, oligo pool was directly  
171 cut out using exonuclease Not I (Figure S8-10) and sequenced by standard NGS. The letter error  
172 including substitution or indel were counted, and it was observed that substitution was higher than indel  
173 error for all of the assembly samples (Figure 2c) and the error rate is in consistent with previous studies.  
174 It was also observed that sequencing reads with single letter error (substitution or indel) was much higher  
175 than others (Figure S11), which is in agreement with our previous study as well.<sup>[4]</sup> For all of the assembly  
176 sample, oligo was 100% identified in the sequencing reads, but 1F assembly recorded the low minimal  
177 necessary coverage of sequencing reads, at which perfect 100% oligos can be identified (Figure 2d and  
178 Figure S12). After the success of oligo retrieve using solid culture, mixed culture in liquid medium was  
179 also tested (Figure S13). Plasmid was isolated from 5 ml liquid mixed cell culture and sequenced. The  
180 minimal necessary coverage was counted even lower than 1F assembly on solid surface (Figure 2d).  
181 Furthermore, the frequency for each oligo counted in the retrieved pool was quantified and similar  
182 frequency distribution (Figure S14) were observed for all the assembly samples with very close Gini  
183 index (Figure S15). These results demonstrated that the DNA pool of 509 distinct oligos was stably stored  
184 in mixed culture.

185 Next, a DNA pool comprising 11520 distinct oligos with 200 nucleotides in length, over 20 times larger  
186 than the first pool, was tested. There is about 445 KB digital files were encoded, including image, word  
187 text and virous type files (Figure S3b). It was observed that the mixed culture in liquid medium gave  
188 more lower minimal necessary coverage of sequencing reads than solid culture. Additionally, subculture  
189 is necessary for long-term storage at low cost. Therefore, the DNA pool with 11520 oligos were  
190 assembled to test the subculture of this huge cell population (**Figure 3a**). Totally, the mixed culture was  
191 successively passaged 5 times, and plasmid carrying digital DNA were isolated from a large liquid  
192 culture and then massive oligos was recovered following Not I digest (Figure S16). There is no obvious  
193 difference was observed in the letter error rate even between the 1<sup>st</sup> and 5<sup>th</sup> subculture of 1F or 3F  
194 assembly samples (Figure 3b). Being in agreement with previous result, the substitution ratio is still



195 higher than indel. From the NGS sequencing reads, some sequences were identified as contamination  
196 from host cell genome by deep bioinformatic sequence comparison analysis, but the contamination  
197 content is very low, less than 0.2% of the total sequencing reads. This contamination may come from the  
198 step of plasmid isolation, because there is also 20 Not I cleavage site on the DH10 $\beta$  genome. But it is  
199 very easy to distinguish these contaminations from the true digital oligo sequence by these designed  
200 adaptor sequence on the oligo terminal end (Figure S3a). Due to the digital DNA sequence was stored in  
201 plasmid, it is still relatively easy to remove the host cell genome contamination clearly in the isolation  
202 process just using available commercial bio-reagent. It could be another advantage in comparing with  
203 approach, in which digital DNA sequence were directly stored on cell genome.

204 Interestingly, the population of assembled plasmid carrying the inserted digital DNA sequence remained  
205 relatively stable. The frequency for each oligo in the pool was not changed significantly in comparing  
206 the 1<sup>st</sup> and 5<sup>th</sup> passage of 1F or 3F assembly sample (Figure 3c and Figure S17) and the dropout rate  
207 decreased when the sequencing going deep (Figure 3d and Figure S18). The bioinformatic analysis  
208 demonstrated the stability of oligo pool recovered from the successive passaging. To be surprising, the  
209 mixed culture of *E. coli* cells carrying this large population of oligos remained its content uniformity, the  
210 Gini index was 0.41 and 0.48 for 1<sup>st</sup> and 5<sup>th</sup> of 1F assembly sample respectively (Figure S19). In contrast,  
211 the content uniformity was skewed significantly for 3F assembly sample (Figure 3e). In comparing with  
212 1F assembly, in 3F assembly about 21% oligos were enriched accounting for up to 96.2% of the total  
213 sequencing reads and the left 79% oligos was largely deprived only accounting for 3.8% of sequencing  
214 reads, resulting to a 0.87 of Gini index (Figure 3f). However, the 1<sup>st</sup> and 5<sup>th</sup> of 3F assembly sample was  
215 relatively consistent with close Gini index and oligo content frequency. The stable oligo frequency  
216 distribution even across multiple passaging indicated that the mixed culture of living cell could be  
217 qualified materials for data storage.

### 218 **2.3 Large scale DNA data storage in living cell**

219 Thus, living cell mediated DNA data storage was demonstrated in a large scale by a simple multiple-step  
220 process, by which DNA pool comprising of massive oligos could be quickly transferred into living cell  
221 for data storage (**Figure 4a**). Furthermore, deep bioinformatic analysis explored the underlying principle  
222 of this digital storage cell manufacture process. The assembly is found as biased process, its efficiency  
223 going down with assembly fragment number increased in the designed redundant assembly. For 11520  
224 DNA pool, much less colony number was counted from 3F assembly than 1F sample and average copy  
225 number per designed oligo was calculated as 9.42 for 1F and only 0.91 for 3F assembly sample. Thus, it  
226 took more long time for 1<sup>st</sup> of 3F assembly cell (11 hrs) to reach 1.2 of OD<sub>600</sub> than 1F assembly cell (8.4  
227 hrs). Even over 1E+6 average molecule copy for each fragment was subjected to the assembly process,  
228 but the success assembled copy number for each oligo was quantified only from dozens to hundreds after  
229 assembly and transform step. However, the mixed culture amplified the population in a relatively stable  
230 fashion without skewing the oligo frequency distribution, probably over 1E+7 average copy of each oligo  
231 could be recovered from a batch culture. From these recovered oligos, all of the 1F subculture sample  
232 retrieved enough oligo (about 1E+3 copy of each oligo) for perfect information decoding, with final 0.9%  
233 and 1.4% dropout rate for 1<sup>st</sup> and 5<sup>th</sup> respectively lower than the 1.56% of decoding limitation. But more  
234 oligo was lost in 3F assembly sample, with 26.5% and 32.8% dropout rate for 1<sup>st</sup> and 5<sup>th</sup> respectively and  
235 similar retrieve rate was obtained in oligo pool recovered by PCR amplification (Figure S20). By  
236 mapping the dropout oligo of 1F assembly into the frequency distribution of the original master pool  
237 from chip synthesis, it found that the dropout oligo of master pool in sequencing coverage of 10x did not  
238 overlap with that of 1F and many oligos in the 1F dropout were mapped to high frequency in master pool  
239 (Figure 4b). Furthermore, the enriched oligos group in 3F 1<sup>st</sup> were also mapped to the frequency  
240 distribution of master pool, this group of oligos covered very wide area and mapped to oligos with both  
241 high and low coverage (Figure S21). In 10-mer DNA sequence pattern analysis, the top 10% high  
242 frequency 10-mer pattern accounted for 42.1% of total 10-mer pattern counts for 3F 1<sup>st</sup> assembly sample,  
243 but the 26.5% for 1F 1<sup>st</sup> assembly resulting to 16.4% decreasing (Figure S22). The 10-mer frequency

244 distribution was obviously different between the enriched deprived oligos sequence (Figure S23). These  
245 results also supported that the assembly process is a biased process dependent on the sequence context  
246 rather than the oligo concentration in original master pool. But as long as the living cell materials  
247 manufactured, the mixed culture preserved stability of digital DNA for large scale living cell data storage.

### 248 **3. Discussion:**

249 DNA is expected as high-potential material for mass data storage, the serious problem human society  
250 will face in the very near future. Beside the storage density, the crucial features including storage  
251 longevity and low copy cost are highly dependent on biological system of cell. Thus far, the data storage  
252 capability has been demonstrated majorly using massive oligo pool, up to 13 million DNA oligos from  
253 the advanced chip synthesis.<sup>[24]</sup> Although several molecular tools have been adapted from CRISPR and  
254 special recombinase to write information into cell genome, the capability is still very far away from in  
255 vitro system, not larger than 20K bps so far.<sup>[25]</sup> Theoretically, one intact single DNA fragment is the  
256 desirable material for data storage as the way genome do in nature, but the current DNA writing  
257 technology is not designed for long DNA synthesis. Although, the entire bacterial genome has been built  
258 up from the chemical synthesized oligos,<sup>[26]</sup> but large size DNA fragment synthesis requires extreme  
259 much labor and time. The cost for DNA fragment over 10 Kbps is about 0.2\$/nt at the major commercial  
260 company,<sup>[27, 28]</sup> and generally take over several months to build at high failure risk for complicate  
261 sequence. In considering the scale of application, it is hard for large DNA fragment to match for practical  
262 data storage until suitable synthesis technology developed. By contrast, oligo pool with several hundreds  
263 of nucleotides in length could be synthesized at cost lower than 0.001\$/nt,<sup>[27]</sup> several orders of  
264 magnitudes lower than large fragment DNA synthesis, and over million distinct strands could be  
265 manufactured at same time in just couple business days and its cost keep going down with synthesis scale  
266 going up. Therefore, the mixed culture of bacterial cell carrying massive oligo pool could be a high  
267 potential material with advantage of both oligo pool and living cell for data storage. To the best of our  
268 knowledge, in comparison with the major previous reported living cell DNA storage system,<sup>[9, 25, 29]</sup> the  
269 total 2304 kbps DNA achieved the largest storage size of data, including text, image documents and  
270 computer program code, in living cell (Figure 4c and Supplementary Note 2.7). In comparison with  
271 storing long fragment DNA on genome, mixed culture storage materials could be fabricated within 24  
272 hrs after oligo pool synthesis at total manufacture cost, lower than 1E-04\$ per base (Supplementary Note

273 2.3). Thus, in the view of this very artificial approach purpose, digital information storage, it is not  
274 necessary to follow the way by which genome information was recorded in nature.

275 Mixed culture is one technology which has been successfully applied in many fields. In metabolism  
276 engineering, different types of microbe cells were cultured together for mutual metabolism benefit,<sup>[30]</sup>  
277 but the size is relatively small. More larger DNA structure with coding huge genomic diversity were  
278 generated in living cell for screening of specific biofunction in directed evolution research.<sup>[31]</sup> Although  
279 large DNA library has been created in living cells to generate huge phenotype diversity, but stably  
280 carrying these massive DNA structures is not necessary. Generally, it is difficult to balance the growth  
281 rate between different cells. In this present work, even in one insert fragment assembly of the massive  
282 oligo pool, there is at least 11520 genotype and will be a huge number in the redundant assembly of  
283 multiple fragments sample, the largest mixed culture reported so far. However, relative stable mixed  
284 culture was achieved even after multiple cell passaging. The copy number distribution of oligos remained  
285 stable with very similar value of Gini index in the successive multiple passaged mixed culture (Figure  
286 3d and Figure S15, S19, S24-25). The stability could be considered being supported by a few reasons.  
287 The artificial purpose of storing digital information allow designing sequences to avoid sensitive  
288 sequence pattern with specific biofunction, e.g., polynucleotides (polyA, polyT, polyC and polyG) and  
289 specific exonuclease recognition sequence (Supplementary Note 2.2). The bioinformatic analysis  
290 demonstrated that there is no sequence similarity between the designed oligos and the whole *E. coli*  
291 DH10 $\beta$  genome with e-value of 1E-6 (Supplementary Note 2.4). It demonstrated that the digital DNA  
292 sequence has no significant influence on both host cell growth and the vector plasmid replication.  
293 Additionally, storing digital sequence on vector plasmid decreased the information contamination from  
294 genome. Therefore, this simple method is highly compatible with any oligo pool for data storage, and  
295 scale-up could be achieved easily in a parallel manner based on the over 1E+4 oligo storage we  
296 demonstrated here.

297 In manufacturing of living cell material for data storage, assembly and transformation become crucial  
298 step in determining the actual size of oligo population. The deep bioinformatic analysis demonstrated  
299 that assembly process is sequence context biased and transformation is a relatively random and inefficient  
300 process, the size of oligo population decreased almost two orders of magnitude. The bias occurred in  
301 assembly and transformation should highly dependent on the used bioreagent, and homology assembly  
302 method should be re-designed to improve its efficiency for assembly of oligo pool with large molecular  
303 population. In addition, it found that the dropout rate during mixed culture fit in the dropout curve of  
304 master oligo pool, which could be quantified to assess the manufacture of storage material (Figure S26).  
305 Therefore, there is still much space to improve the capability of mixed culture cell in storing data. The  
306 unevenness of oligo copy number in the original chip-synthesized DNA pool is huge, which is also the  
307 serious problem in vitro DNA storage approach.<sup>[21]</sup> Therefore, more synthetic tools could be developed  
308 to improve the chip-synthesized oligo pool and foreign DNA transformation, and balance the large size  
309 mixed culture. In summary, DNA oligo pool from chip synthesis comprising of over ten thousand strands  
310 was quick transferred into the living cell for data storage, the mixed culture of *E. coli* cells is a stable  
311 material for massive digital DNA sequence and achieved the largest data storage in living cell.

#### 312 **4. Experimental Section**

313 *Library construction:* For 509 assembly experiment, the oligo pool was synthesized and the lyophilized  
314 pool consisted of 11776 oligos of 192 nts, which included the 152 nts payload in each oligo. The pool  
315 was resuspended in 1× TE buffer for a final concentration of 2 ng/μL. One of the files, 509 oligos, was  
316 flanked by landing sites for primers F01/R01. PCR was performed using Q5® High-Fidelity DNA  
317 Polymerases (NEB #M0491) and primers F01/R01 (10 ng oligos, 2.5 μL of each primer (100 mM), 0.5  
318 μL Q5 High-Fidelity DNA Polymerases, 4 μL 2.5 mM dNTPs in a 50 μL reaction). Thermocycling  
319 conditions were as follows: 5 min at 98 °C; 10 cycles of: 10 s at 98 °C, 30 s at 56 °C, 30 s at 72 °C,  
320 followed by a 5 min extension at 72 °C. The library was then purified using Plus DNA Clean/Extraction

321 Kit (GMbiolab Co, Ltd. #DP034P) and eluted in 40  $\mu$ L ddH<sub>2</sub>O. This library was considered the master  
322 pool and run on the 2% agarose gel to verify the correct size. For 11520 assembly experiment, the  
323 synthetic DNA pool consisted of 11520 oligos of 200 nts, which included the 155 nts payload flanked  
324 by landing sites for primers F02/R02 (Figure S3). The lyophilized pool was rehydrated in 1 $\times$  TE buffer  
325 and used the above protocol to amplify the file.

326 *DNA storage in living cells:* For the 509 oligos pool assembly fragment preparation, we started with the  
327 master pool as described above. The fragments were prepared with different homologous arms using  
328 Q5<sup>®</sup> High-Fidelity DNA Polymerases and the corresponding primers. Then the Gibson Assembly<sup>®</sup>  
329 Master Mix – Assembly (NEB, #E2611) was used according to user's manual. For the 11520 oligos pool  
330 assembly fragment preparation, we started with the master pool as described above. The fragments were  
331 prepared with different homologous arms using 2 $\times$ EasyTaq<sup>®</sup> PCR SuperMix (AS111, TRANS) and the  
332 corresponding primers. NEBuilder<sup>®</sup> HiFi DNA Assembly Cloning Kit (NEB, #E5520) was used  
333 according to user's manual. After assembly, the constructed samples were transformed into DH10 $\beta$   
334 electrocompetent cells. The information about experimental procedures was detailed in supporting  
335 information.

336 *Data recovery:* After liquid and plate culture, the plasmid was extracted using plasmid miniprep  
337 Kit (TIANGEN, #DP103), respectively. Then QuickCut<sup>™</sup> Not I (Takara, #1623) was used for fragments  
338 recovery. After gel cut by Plus DNA Clean/Extraction Kit, the samples of 509 oligos pool (1 F, 3 F and  
339 5 F) and 11520 oligos (passage-1 and passage-5 of 1F and 3 F) were sequenced directly. To get more  
340 complete information, we performed a PCR amplify process from constructed plasmid to amplify 11520  
341 oligos (passage-1 and passage-5 of 1F and 3 F) using Q5<sup>®</sup> High-Fidelity DNA Polymerases and primer  
342 set F02/R02. The thermocycling protocol was: (1) 98  $^{\circ}$ C for 5 min, (2) 98  $^{\circ}$ C for 30 s, (3) 54  $^{\circ}$ C for 30 s,  
343 (4) 72  $^{\circ}$ C for 10 s, then repeat steps 2–4 five times. Finally, the PCR reaction was terminated at 72  $^{\circ}$ C  
344 for 5 min, and purified using Plus DNA Clean/Extraction Kit (GMbiolab Co, Ltd. #DP034P) then  
345 sequenced them.

346 **Supporting Information**

347 Supporting Information is available from the Wiley Online Library or from the author.

348 **Acknowledgements**

349 This work was supported by National Science Foundation of China (Grant No.21476167, No.21778039  
350 and No.21621004). M. H., Y. G. and H. Qiao contributed equally to this work.

351 **Conflict of Interest**

352 H. Q. is the inventor of one patent application for the biochemical method described in this article. The  
353 initial filing was assigned Chinese patent application (201911121023.7). The remaining authors declare  
354 no conflict of interest.



355 **Reference**

- 356 [1] N. Goldman, P. Bertone, S. Chen, C. Dessimoz, E. M. LeProust, B. Sipos, E. Birney, *Nature*  
357 **2013**, 494, 77.
- 358 [2] L. Ceze, J. Nivala, K. Strauss, *Nat Rev Genet* **2019**, 20, 456.
- 359 [3] Y. Erlich, D. Zielinski, *Science* **2017**, 355, 950.
- 360 [4] L. Organick, S. D. Ang, Y.-J. Chen, R. Lopez, S. Yekhanin, K. Makarychev, M. Z. Racz, G.  
361 Kamath, P. Gopalan, B. Nguyen, *Nature biotechnology* **2018**, 36, 242.
- 362 [5] J. J. Kozich, S. L. Westcott, N. T. Baxter, S. K. Highlander, P. D. Schloss, *Appl. Environ.*  
363 *Microbiol.* **2013**, 79, 5112.
- 364 [6] L. Organick, S. D. Ang, Y.-J. Chen, R. Lopez, S. Yekhanin, K. Makarychev, M. Z. Racz, G.  
365 Kamath, P. Gopalan, B. Nguyen, *BioRxiv* **2017**, 114553.
- 366 [7] F. F. a. T. K. Lu, SYNTHETIC BIOLOGY, 346, 1256272; L. Song, A.-P. Zeng, *ACS synthetic*  
367 *biology* **2018**, 7, 866.
- 368 [8] N. Yachie, K. Sekiyama, J. Sugahara, Y. Ohashi, M. Tomita, *Biotechnology progress* **2007**, 23,  
369 501.
- 370 [9] Q. W. Jian Sun, Wenyi Diao, Chi Zhou, Bingbing Wang, Liqun Rao, Ping Yang, *Medical*  
371 *Research Archives* **2019**, 7, 2.
- 372 [10] J. Yan, A. Cirincione, B. Adamson, *Molecular Cell* **2020**, 77, 210; A. J. Simon, A. D. Ellington,  
373 I. J. Finkelstein, *Nucleic acids research* **2019**, 47, 11007.
- 374 [11] Y. Zu, X. Tong, Z. Wang, D. Liu, R. Pan, Z. Li, Y. Hu, Z. Luo, P. Huang, Q. Wu, *Nature methods*  
375 **2013**, 10, 329; J. L. Bessen, L. K. Afeyan, V. Dančik, L. W. Koblan, D. B. Thompson, C. Lechner, P.  
376 A. Clemons, D. R. Liu, *Nature communications* **2019**, 10, 1.
- 377 [12] M. Adli, *Nature communications* **2018**, 9, 1; C. D. Richardson, G. J. Ray, M. A. DeWitt, G. L.  
378 Curie, J. E. Corn, *Nature biotechnology* **2016**, 34, 339.
- 379 [13] S. Kosuri, N. Eroshenko, E. M. LeProust, M. Super, J. Way, J. B. Li, G. M. Church, *Nature*  
380 *biotechnology* **2010**, 28, 1295.
- 381 [14] S. Jünemann, F. J. Sedlazeck, K. Prior, A. Albersmeier, U. John, J. Kalinowski, A. Mellmann, A.  
382 Goesmann, A. Von Haeseler, J. Stoye, *Nature biotechnology* **2013**, 31, 294; A. Von Bubnoff, *Cell* **2008**,  
383 132, 721.
- 384 [15] J. L. Weber, E. W. Myers, *Genome research* **1997**, 7, 401.
- 385 [16] A. S. Xiong, Q. H. Yao, R. H. Peng, H. Duan, X. Li, H. Q. Fan, Z. M. Cheng, Y. Li, *Nature*  
386 *protocols* **2006**, 1, 791.
- 387 [17] C. A. Hutchison, R.-Y. Chuang, V. N. Noskov, N. Assad-Garcia, T. J. Deerinck, M. H. Ellisman,  
388 J. Gill, K. Kannan, B. J. Karas, L. Ma, *Science* **2016**, 351; D. G. Gibson, J. I. Glass, C. Lartigue, V. N.  
389 Noskov, R.-Y. Chuang, M. A. Algire, G. A. Benders, M. G. Montague, L. Ma, M. M. Moodie, *Science*  
390 **2010**, 329, 52.
- 391 [18] D. G. Gibson, H. O. Smith, C. A. Hutchison, J. C. Venter, C. Merryman, *Nature methods* **2010**,  
392 7, 901.
- 393 [19] J. N. Seth L. Shipman, Jeffrey D. Macklis, George M. Church, *Nature* **2017**, 547, 345.
- 394 [20] Y. Gao, X. Chen, J. Hao, C. Zhang, H. Qiao, H. Qi, **2020**.
- 395 [21] Y.-J. Chen, C. N. Takahashi, L. Organick, K. Stewart, S. D. Ang, P. Weiss, B. Peck, G. Seelig,  
396 L. Ceze, K. Strauss, *BioRxiv* **2019**, 566554.
- 397 [22] J. N. Zadeh, C. D. Steenberg, J. S. Bois, B. R. Wolfe, M. B. Pierce, A. R. Khan, R. M. Dirks, N.  
398 A. Pierce, *Journal of computational chemistry* **2011**, 32, 170.
- 399 [23] M. A. Riley, D. M. Gordon, *Trends in microbiology* **1999**, 7, 129; L. Chao, E. C. Cox, *Evolution*  
400 **1983**, 125.
- 401 [24] L. Organick, S. D. Ang, Y. J. Chen, R. Lopez, S. Yekhanin, K. Makarychev, M. Z. Racz, G.  
402 Kamath, P. Gopalan, B. Nguyen, C. N. Takahashi, S. Newman, H. Y. Parker, C. Rashtchian, K. Stewart,

- 403 G. Gupta, R. Carlson, J. Mulligan, D. Carmean, G. Seelig, L. Ceze, K. Strauss, *Nat Biotechnol* **2018**, 36,  
404 242.
- 405 [25] S. L. Shipman, J. Nivala, J. D. Macklis, G. M. Church, *Nature* **2017**, 547, 345.
- 406 [26] J. Fredens, K. Wang, D. de la Torre, L. F. H. Funke, W. E. Robertson, Y. Christova, T. Chia, W.  
407 H. Schmied, D. L. Dunkelmann, V. Beranek, C. Uttamapinant, A. G. Llamazares, T. S. Elliott, J. W.  
408 Chin, *Nature* **2019**, 569, 514.
- 409 [27] S. Kosuri, G. M. Church, *Nature methods* **2014**, 11, 499.
- 410 [28] R. A. Hughes, A. D. Ellington, *Cold Spring Harbor perspectives in biology* **2017**, 9.
- 411 [29] K. S. Nozomu Yachie, Junichi Sugahara, Yoshiaki Ohashi and Masaru Tomita, *Biotechnology*  
412 *Progress* **2007**, 23, 501.
- 413 [30] Y. Chen, *Journal of industrial microbiology & biotechnology* **2011**, 38, 581; J. Pang, M. Hao, Y.  
414 Shi, Y. Li, M. Zhu, J. Hu, J. Liu, Q. Zhang, Z. Liu, *BioResources* **2018**, 13, 5377.
- 415 [31] M. J. Olsen, D. Stephens, D. Griffiths, P. Daugherty, G. Georgiou, B. L. Iverson, *Nature*  
416 *biotechnology* **2000**, 18, 1071; J. C. Sadler, A. Currin, D. B. Kell, *The Analyst* **2018**, 143, 4747.
- 417

418 **Figure Captions:**

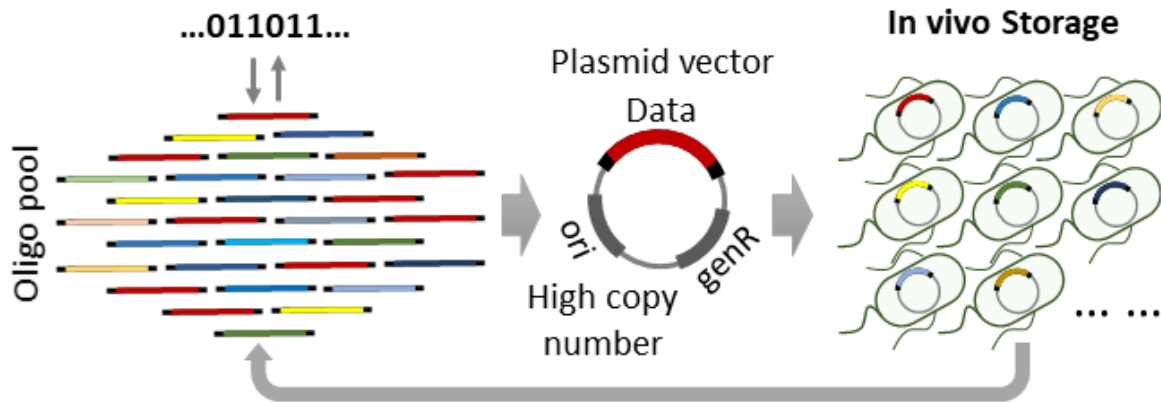

419

420 **Figure 1.** Illustration of mixed culture of bacterial cell for large data storage. First, binary digital  
421 information was translated into nucleotide sequence by BASIC encoding system, and then synthesized  
422 in a large short oligo pool by chip-based high-throughput synthesis. The oligo pool was assembled into  
423 circular plasmid and then transformed into bacterial cell for stable data storage. Oligo pool could be  
424 retrieved from the mixed culture of cells for information decoding when need.

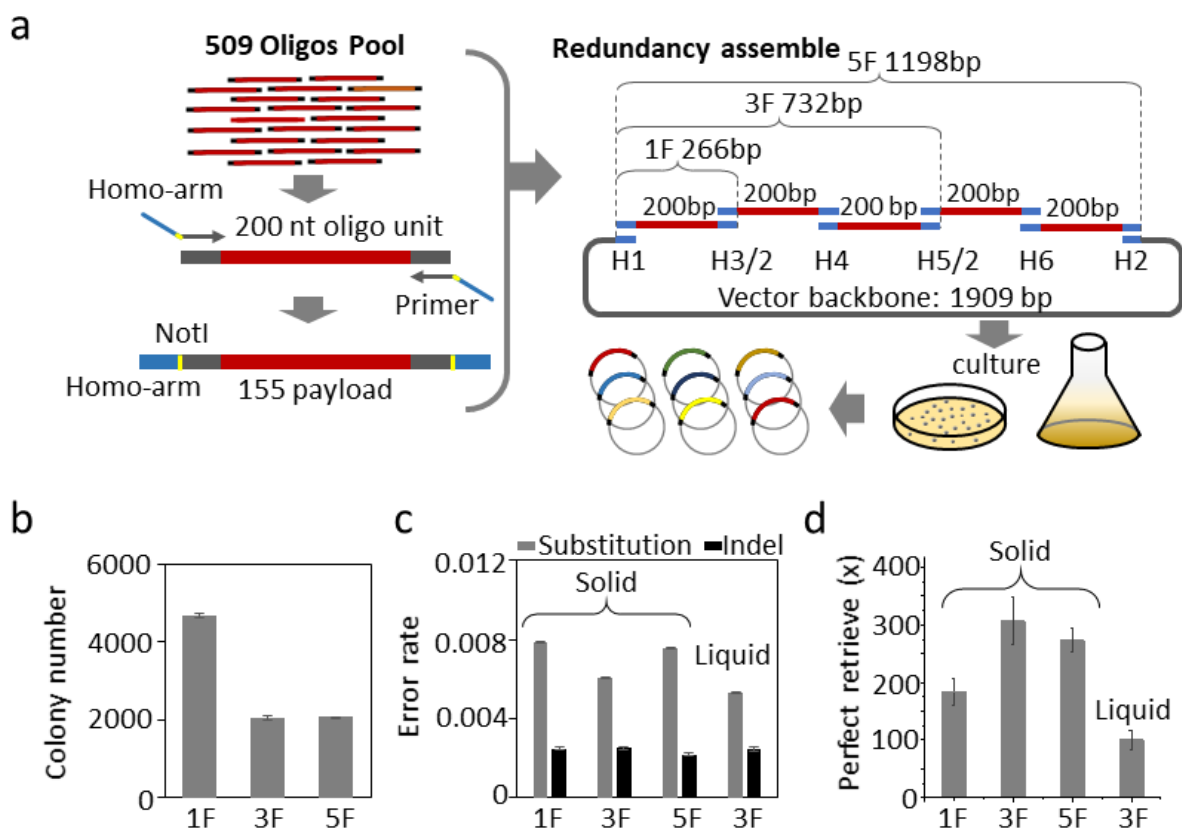

425

426 **Figure 2.** Redundant assembly of 509 oligos pool for mixed culture. a) Schematic for workflow of  
 427 assembly of DNA pool comprising 509 distinct oligos. Oligos were fused with homology arm via PCR  
 428 amplification, Not I cleavage site were for oligo retrieve afterwards. Multiple insert fragments, 1F  
 429 indicate one insert fragment, 3F for three insert fragments and 5F for five insert fragments respectively,  
 430 each fragment comprising all the 509 oligos, are assembled into a vector plasmid backbone of 1909 bps  
 431 in length by off-the-shelf homology assembly reagents. Last, the assembled plasmids are transformed in  
 432 *E. coli* cell for mixed culture on solid or liquid medium. b) Colony number was counted from solid  
 433 medium surface for 1F, 3F and 5F assembly. c) Letter error, base substitution or indel (both of base  
 434 insertion or deletion) occurred in oligo pool retrieved from mixed culture on solid or liquid medium and  
 435 quantified as percentage of counted error base number vs total sequenced base, substitution error in gray  
 436 bar, indel error in dark bar. d) the minimal necessary sequencing reads depth for perfect retrieve of all  
 437 509 oligos from 1F, 3F, and 5F assembly sample on solid or liquid medium. Error bars represent the  
 438 mean  $\pm$ s.d., where  $n=3$ .

439

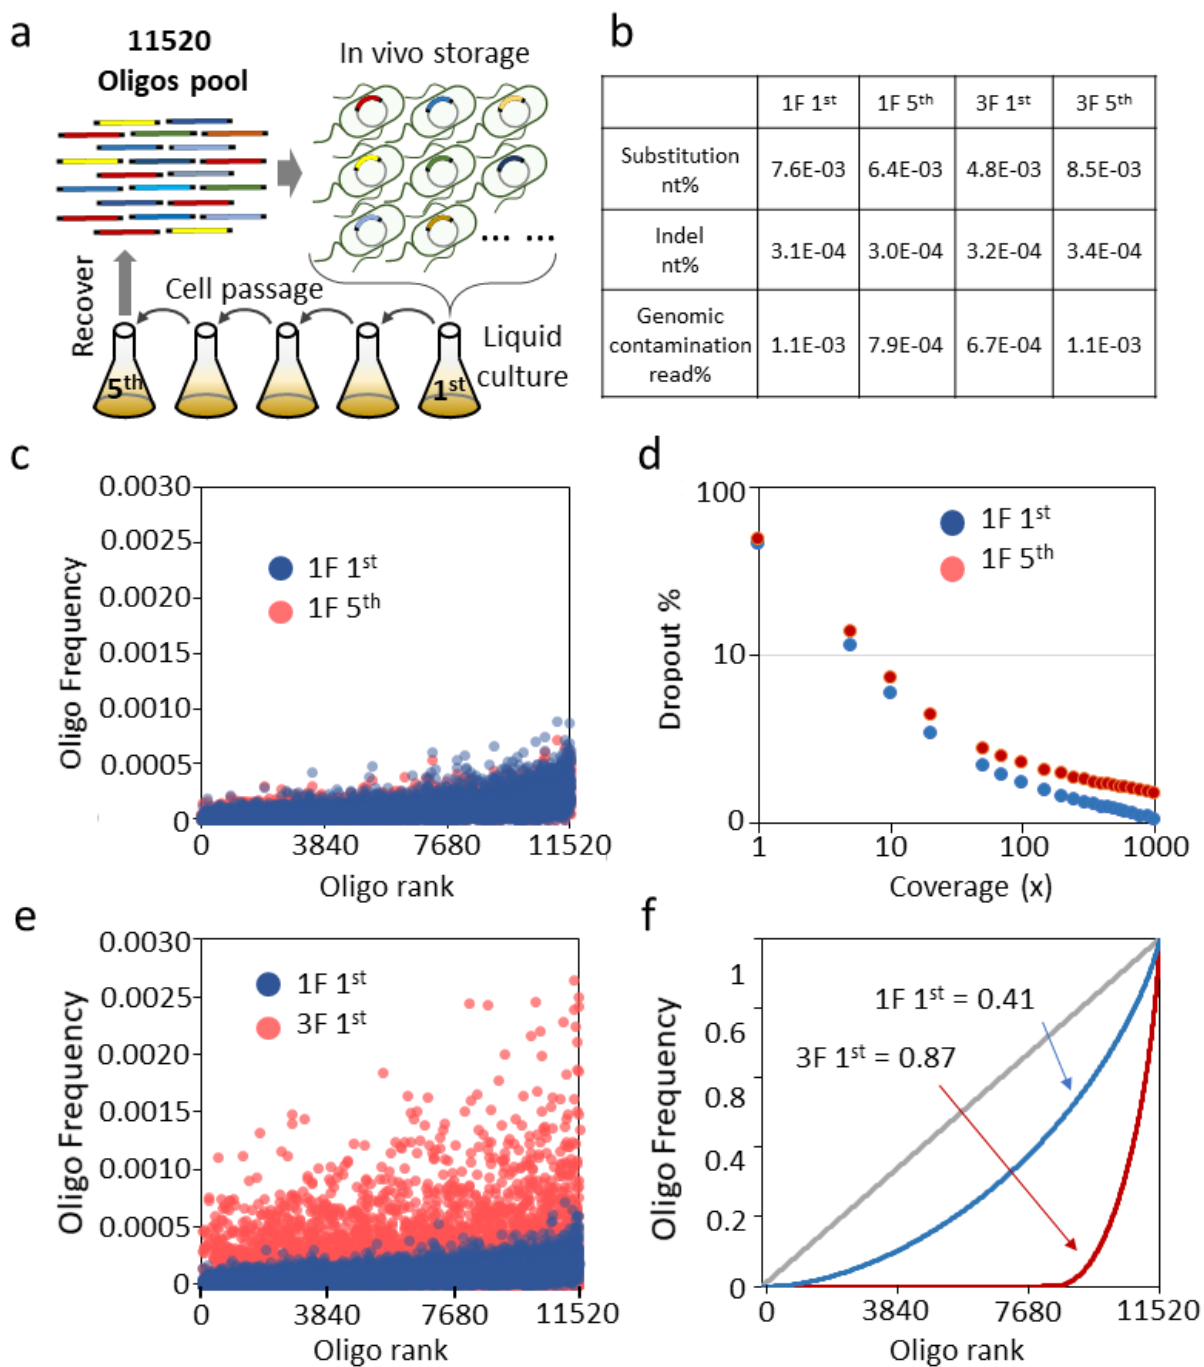

440

441 **Figure 3.** Mixed culture of cells carrying redundant assembled 11520 oligos for large data storage. a)

442 Schematic of cells carrying assembled 11520 oligos pool for successive multiple subculture, cells

443 collected from 1<sup>st</sup> and 5<sup>th</sup> passaging were subjected to oligo retrieve and information decoding. b)

444 error rate was quantified form sequenced oligos of 1<sup>st</sup> and 5<sup>th</sup> subculture of one insert fragment (1F) or

445 three insert fragments (3F) assembly. The amount of oligo with sequence in high similarity with host cell  
446 genome in sequencing reads was identified as genomic contamination. c) The frequency for each of  
447 11520 oligos quantified in sequencing reads from 1<sup>st</sup> (blue dot) and 5<sup>th</sup> (red dot) passaging of one  
448 fragment (1F) assembly sample. d) Oligo dropout rate was quantified from different sequencing depth  
449 (various amount NGS sequencing reads) of 1<sup>st</sup> (blue dot) and 5<sup>th</sup> (red dot) passaging of one fragment (1F)  
450 assembly sample. e) The frequency for each of 11520 oligos quantified in sequencing reads from the  
451 first cell passaging of one insert fragment assembly (1F, blue dot) and three insert fragment assembly  
452 (3F, red dot). f) Gini index was quantified for the oligo frequency distribution in the retrieved oligo pool.  
453 The 1<sup>st</sup> passaging of one fragment assembly was quantified as 0.41 (blue line) and 0.87 for 1<sup>st</sup> passaging  
454 of three fragment assembly (red line).

455

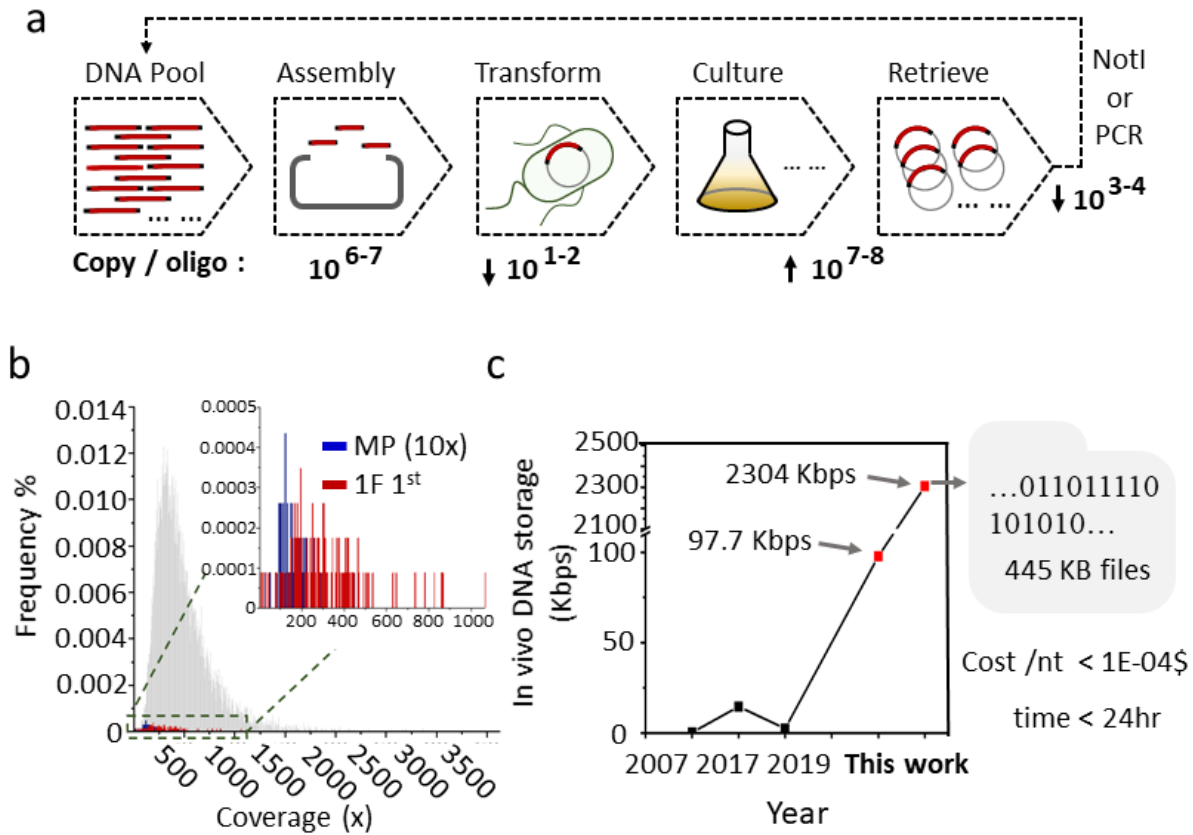

456

457 **Figure 4.** A large-scale DNA data storage in living cell. a) The workflow for the manufacture of mixed  
 458 culture living cell data storage materials. Oligo pool was assembled with  $1E+6\sim7$  of average copy of  
 459 each oligo was subjected to assembly and then transformed into *E. coli* cell with about  $1E+1\sim2$  average  
 460 colony number of each oligo was obtained and then the cell population could be amplified to large scale  
 461 in mixed culture for further plasmid retrieve and information decoding. b) the 0.9% dropout oligos in 1<sup>st</sup>  
 462 passaging of one fragment assembly (red line) and the 0.56% dropout oligos in 10x sequencing reads of  
 463 original master pool (blue line) were mapped to the oligo frequency distribution of original master pool  
 464 (gray line). c) In comparison with previous reported major systems for DNA storage in living cell  
 465 including 0.25 kbps by Yachie in 2007, 18.2 kbps by Shipman in 2017 and 2.8 kbps by Sun in 2019, totally  
 466 97.7 kbps DNA for 509 oligos pool and 2304 kbps for 11520 oligos pool were stored in mixed culture  
 467 of *E. coli* cells at cost lower than  $1E-4$ \$ per base and mixed cell storage materials could be manufactured  
 468 within 24 hrs.
